# Supplementary material for: Ultrafast charging/discharging and highly stable non-aqueous iron-ion batteries using iron oxide (Fe3O4) microspheres as an efficient cathode material
Source: Royal Society of Chemistry journal article supplement (doi:10.1039/d4se00970c), 2024-01-01
Supplement: d4se00970c1.pdf [file d4se00970c1.pdf]

## Electronic Supplementary Information (ESI)

### **Ultrafast Charging/Discharging and Highly Stable Non-Aqueous Iron-Ion Batteries using Iron oxide (Fe<sub>3</sub>O<sub>4</sub>) Microspheres as Efficient Cathode Material**

Jitendra Kumar Yadav, Bharti Rani, Priyanka Saini, Anant Prakash Pandey and Ambesh Dixit\*

Advanced-Materials and Device (A-MAD) Laboratory, Department of Physics, Indian Institute of Technology Jodhpur, Jodhpur, Rajasthan 342030, India

\*Corresponding author – [ambesh@iitj.ac.in](mailto:ambesh@iitj.ac.in)

**Supplementary material**

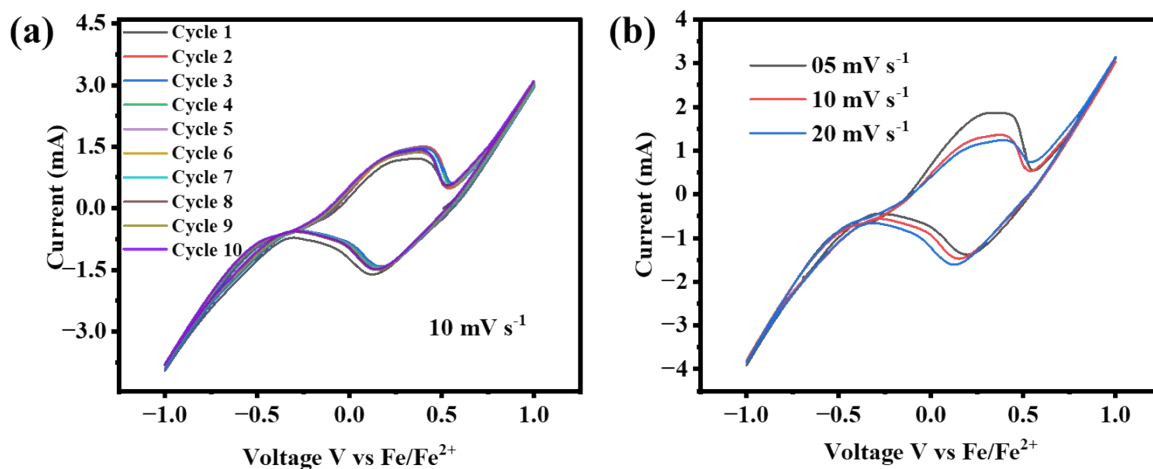

**Figure S1:** The cyclic voltammetry plots for the reversible electroplating/stripping process of the  $\text{Fe}^{2+}$  ions (a) starting 10 cycles at  $10 \text{ mV s}^{-1}$  (b) starting cycles at a scan rate of the  $05 \text{ mV s}^{-1}$ ,  $10 \text{ mV s}^{-1}$ , and  $20 \text{ mV s}^{-1}$

**Table S1:** Different component values of the equivalent circuit fitted after the different GCD cycles of the Nyquist plot

| No. of cycles<br>(GCD Cycles) | $R_b$ ( $\Omega$ ) | $R_{SEI}$ ( $\Omega$ ) | $R_{CT}$ ( $k\Omega$ ) | $C_{SEI}$ ( $\mu\text{F}$ ) | $C_{CT}$ ( $\mu\text{F}$ ) | CPE ( $\mu\text{Mho}$ ) | $\xi^2$ |
|-------------------------------|--------------------|------------------------|------------------------|-----------------------------|----------------------------|-------------------------|---------|
| Before 1 <sup>st</sup>        | 53.8               | 5.31                   | 1.01                   | 29.9                        | 110                        | 293                     | 0.02    |
| After 150 <sup>th</sup>       | 80.3               | 333                    | 1.12                   | 952                         | 1020                       | 737                     | 0.02    |
| After 300 <sup>th</sup>       | 116                | 1.18 k                 | 1.78                   | 835                         | 523                        | 281                     | 0.1     |
| After 500 <sup>th</sup>       | 201                | 2.07 k                 | 1.92                   | 1240                        | 396                        | 278                     | 0.07    |
